# Supplementary material for: The Unmet Needs of Community-Dwelling Stroke Survivors: A Systematic Review of Qualitative Studies
Source: PubMed Central journal article supplement (PMC7926407; doi:10.3390/ijerph18042140), 2021-02-22
Supplement: ijerph-18-02140-s001.pdf [file ijerph-18-02140-s001.pdf]

**Table S1.** JBI Critical Appraisal Checklist for Systematic Reviews and Research Syntheses

|                                                                                     | Yes | No | Unclear | Not applicable |
|-------------------------------------------------------------------------------------|-----|----|---------|----------------|
| 1. Is the review question clearly and explicitly stated?                            | ✓   |    |         |                |
| 2. Were the inclusion criteria appropriate for the review question?                 | ✓   |    |         |                |
| 3. Was the search strategy appropriate?                                             | ✓   |    |         |                |
| 4. Were the sources and resources used to search for studies adequate?              | ✓   |    |         |                |
| 5. Were the criteria for appraising studies appropriate?                            | ✓   |    |         |                |
| 6. Was critical appraisal conducted by two or more reviewers independently?         | ✓   |    |         |                |
| 7. Were there methods to minimize errors in data extraction?                        | ✓   |    |         |                |
| 8. Were the methods used to combine studies appropriate?                            | ✓   |    |         |                |
| 9. Was the likelihood of publication bias assessed?                                 | ✓   |    |         |                |
| 10. Were recommendations for policy and/or practice supported by the reported data? | ✓   |    |         |                |
| 11. Were the specific directives for new research appropriate?                      | ✓   |    |         |                |

Overall appraisal:    Include        Exclude        Seek further info
